# Supplementary material for: A new SINS/RCNS integrated navigation method based on star pixel coordinates
Source: Springer Nature journal article supplement (doi:10.1007/s11432-022-3630-1), 2023-04-07
Supplement: 11432_2022_3630_MOESM1_ESM.pdf [file 11432_2022_3630_MOESM1_ESM.pdf]

• Supplementary File •

# A New SINS/RCNS Integrated Navigation Method Using Star Pixel Coordinates

Guangxin SONG<sup>1</sup>, Yuqing YANG<sup>1</sup>, Xiaolin NING<sup>2\*</sup>, Jiancheng FANG<sup>1</sup> & Weiren WU<sup>3</sup>

<sup>1</sup>*School of Instrumentation Science and Opto-electronics Engineering, Beihang University, Beijing 100191, China;*

<sup>2</sup>*School of Research Institute for Frontier Science, Beihang University, Beijing 100191, China;*

<sup>3</sup>*Lunar Exploration and Space Program Center, China National Space Administration, Beijing 100037, China*

## Appendix A Measurement model

The measurement model of the star pixel coordinates cannot be expressed by a simple equation. According to (2) and (3), we can obtain the implicit equation about the starlight refraction angle

$$\sqrt{r^2 - u^2} + u \tan R - R_e = 69.21177057R^{0.9805} - 6.441326 \ln R - 21.74089877 \quad (A1)$$

where  $R_e$  is the Earth's radius,  $r = |\mathbf{r}|$ ,  $u = |\mathbf{u}| = |\mathbf{r} \cdot \mathbf{S}_i|$ ,  $\mathbf{S}_i$  represents the unit starlight vector before refraction in the geocentric inertial frame,  $\mathbf{r} = \mathbf{C}_e^i \mathbf{r}^e$  represents the position vector of the spacecraft in the geocentric inertial frame,  $\mathbf{C}_e^i$  represents the transformation matrix between the earth fixed frame and the geocentric inertial frame, and  $\mathbf{r}^e$  can be expressed as

$$\mathbf{r}^e = \begin{bmatrix} (R_e + H) \cos(L + \delta L) \cos(\lambda + \delta \lambda) \\ (R_e + H) \cos(L + \delta L) \sin(\lambda + \delta \lambda) \\ (R_e + H) \sin(L + \delta L) \end{bmatrix} \quad (A2)$$

where  $\lambda$ ,  $L$  and  $H$  are the longitude, latitude and altitude calculated by SINS.

Solving the implicit equation, we can get the starlight refraction angle  $\hat{R}$ . According to the starlight vector  $\mathbf{S}_i$  and position vector  $\mathbf{r}$ , the normal vector  $\mathbf{n}$  of the refraction plan can be expressed as

$$\mathbf{n} = -\frac{\mathbf{r} \times \mathbf{S}_i}{|\mathbf{r} \times \mathbf{S}_i|} \quad (A3)$$

Taking the normal vector  $\mathbf{n}$  of the refraction plan as the rotation axis and rotating  $\mathbf{S}_i$  for  $\hat{R}$  in the refraction plan, the unit starlight vector  $\mathbf{S}_r$  of refracted star in the geocentric inertial frame can be expressed as

$$\mathbf{S}_c = \begin{bmatrix} q_0^2 + q_1^2 - q_2^2 - q_3^2 & 2(q_1 q_2 + q_0 q_3) & 2(q_1 q_3 - q_0 q_2) \\ 2(q_1 q_2 - q_0 q_3) & q_0^2 - q_1^2 + q_2^2 - q_3^2 & 2(q_2 q_3 + q_0 q_1) \\ 2(q_1 q_3 + q_0 q_2) & 2(q_2 q_3 - q_0 q_1) & q_0^2 - q_1^2 - q_2^2 + q_3^2 \end{bmatrix} \mathbf{S}_i \quad (A4)$$

where  $q_0 = \cos(\frac{\hat{R}}{2})$ ,  $q_1 = n(1) \sin(\frac{\hat{R}}{2})$ ,  $q_2 = n(2) \sin(\frac{\hat{R}}{2})$ ,  $q_3 = n(3) \sin(\frac{\hat{R}}{2})$ , where  $n(1)$ ,  $n(2)$  and  $n(3)$  represent the weight of  $\mathbf{n}$  in three directions.

According to equation  $S_s = \mathbf{C}_b^s \mathbf{C}_n^b \mathbf{C}_n^{n'} \mathbf{C}_e^n \mathbf{C}_i^e \mathbf{S}_c$ , the unit starlight vector  $S_s$  in star sensor frame can be obtained, and the  $\mathbf{C}_n^{n'}$  and  $\mathbf{C}_e^n$  can be expressed as

$$\mathbf{C}_n^{n'} = \begin{bmatrix} 0 & -\phi_U & \phi_N \\ \phi_U & 0 & -\phi_E \\ -\phi_N & \phi_E & 0 \end{bmatrix} \quad (A5)$$

$$\mathbf{C}_e^n = \begin{bmatrix} -\sin(\lambda + \delta \lambda) & \cos(\lambda + \delta \lambda) & 0 \\ -\sin(L + \delta L) \cos(\lambda + \delta \lambda) & -\sin(L + \delta L) \sin(\lambda + \delta \lambda) & \cos(L + \delta L) \\ \cos(L + \delta L) \cos(\lambda + \delta \lambda) & \cos(L + \delta L) \sin(\lambda + \delta \lambda) & \sin(L + \delta L) \end{bmatrix} \quad (A6)$$

Then the star pixel coordinates can be expressed as

$$(P_x, P_y) = \left( -f \frac{S_s(1)}{S_s(3)}, -f \frac{S_s(2)}{S_s(3)} \right) \quad (A7)$$

where  $S_s(1)$ ,  $S_s(2)$  and  $S_s(3)$  represent the weight of  $\mathbf{S}_s$  in three directions, and  $f$  represents the focus of star sensor.

\* Corresponding author (email: ningxiaolin@buaa.edu.cn)

## Appendix B Simulation results

The Mento-Carlo simulation results of the for navigation methods at the final moment is shown in Table B1.

**Table B1** Mento-Carlo simulation results of different navigation methods at the final moment

| Navigation Method          | Position error[m] |          |          | Velocity error[m/s] |       |        | Posture error[°] |       |       |
|----------------------------|-------------------|----------|----------|---------------------|-------|--------|------------------|-------|-------|
|                            | Longitude         | Latitude | Altitude | East                | North | Zenith | Yaw              | Pitch | Roll  |
| SINS                       | 428.80            | 561.47   | 970.36   | 0.84                | 0.52  | 1.36   | 81.53            | 7.62  | 11.76 |
| Refraction apparent height | 161.96            | 148.24   | 8.16     | 0.28                | 0.29  | 0.14   | 82.58            | 11.44 | 35.56 |
| Starlight refraction angle | 161.33            | 144.59   | 8.32     | 0.27                | 0.26  | 0.14   | 82.54            | 11.49 | 35.87 |
| Star pixel coordinates     | 154.96            | 133.89   | 11.87    | 0.25                | 0.25  | 0.13   | 1.75             | 2.08  | 6.94  |
